## **Male and female mice demonstrate divergent cellular responses in the bed nucleus of stria terminalis (BNST) following morphine withdrawal**

Brennon R. Luster<sup>1,2</sup>, Elizabeth S. Cogan<sup>1</sup>, Karl T. Schmidt<sup>1</sup>, Dipanwita Pati<sup>1,3</sup>, Melanie M. Pina<sup>1,3</sup>, Kedar Dange<sup>1</sup>, and Zoé A. McElligott<sup>1,2,3,#</sup>

<sup>1</sup>Bowles Center for Alcohol Studies, <sup>2</sup>Department of Psychiatry, <sup>3</sup>Department of Pharmacology, University of North Carolina, Chapel Hill, NC

# Corresponding author

Corresponding author: Zoe McElligott, PhD  
Assistant Professor, Bowles Center for Alcohol Studies  
Departments of Psychiatry and Pharmacology  
University of North Carolina, CB #7178  
5101 Thurston-Bowles Bldg.  
Chapel Hill, NC 27759  
TEL. 919-966-8637  
FAX. 919.  
[zoemce@email.unc.edu](mailto:zoemce@email.unc.edu)

Authors' contributions: B.R.L. conceived of project, performed behavior, performed electrophysiology, wrote manuscript; E.S.C. performed behavior, performed electrophysiology, edited manuscript; K.T.S. performed behavior, edited manuscript; D.P. performed electrophysiology, edited manuscript; M.M.P. performed electrophysiology, edited manuscript; K.D. performed behavior; Z.A.M. conceived of and supervised project, supervised BRL, ESC, KTS, KD, performed behavior, wrote manuscript

**Keywords:** bed nucleus of the stria terminalis, GABA, opioids, sex differences, morphine, withdrawal

**Abstract** (150-250 words)

The United States is experiencing an opioid epidemic of significant proportions, imposing enormous fiscal and societal costs. While prescription opioid analgesics are essential for treating pain, the cessation of these drugs can induce a withdrawal syndrome, and thus opioid use often persists to alleviate or avoid these symptoms. Therefore, it is essential to understand the neurobiology underlying this critical window of withdrawal from opioid analgesics to prevent continued usage. To model this, we administered a low dose of morphine, and precipitated withdrawal with naloxone to investigate the behavioral and cellular responses in C57BL/6J male and female mice. Following 3 days of administration, both male and female mice sensitized to the repeated bouts of withdrawal, as evidenced by their composite global withdrawal score. Female mice exhibited increased withdrawal symptoms on some individual measures, but did not show characteristic weight loss observed in male mice. Because of its role in mediating withdrawal-associated behaviors, we examined neuronal excitability and inhibitory synaptic transmission in the bed nucleus of the stria terminalis (BNST) 24 hours following the final precipitated withdrawal. In male mice, morphine withdrawal increased spontaneous GABAergic signaling compared to controls. In contrast, morphine withdrawal decreased spontaneous GABAergic signaling, and increased BNST projection neuron excitability in female mice. Intriguingly, these opposing GABAergic effects were dependent on within slice excitability. Our findings suggest that male and female mice manifest divergent cellular responses in the BNST following morphine withdrawal, and alterations in BNST inhibitory signaling may be a significant factor contributing to the expression of behaviors following opioid withdrawal.

## Introduction

The United States is currently experiencing an opioid epidemic that claims the lives of an estimated 115 Americans every day (Center for Disease Control, 2017). Drug overdoses continue to rise in the U.S., and more than three out of five drug overdose deaths involve an opioid (Hedegaard et al., 2016). Prescription opioids are useful in treating acute pain, however, the cessation of these drugs, especially after chronic use, can induce a highly dysphoric withdrawal syndrome marked by negative somatic (vomiting, cold/hot flashes, shaking, diarrhea, etc.) and emotional symptoms (anxiety, dread) which often lead patients into persistent opioid seeking. Indeed, intensity of withdrawal symptoms is highly correlated to poor patient compliance for opioid use disorder (OUD) (Fishman, 2008; Kanof et al., 1993), and increased Distress Intolerance (the actual and/or perceived lack of ability to cope with the aversive somatic and/or emotional states associated with withdrawal) is associated with elevated opioid misuse in chronic pain patients (McHugh et al., 2016). Additionally, prescription opioid exposure alone is a strong risk factor for an OUD. It has been shown that patients with chronic noncancer pain who were prescribed opioid analgesics had significantly higher rates of developing an OUD compared to those not prescribed opioids (Edlund et al., 2014). Therefore, it is imperative to investigate this critical period of withdrawal from prescription opioid analgesics which often initiates opioid misuse.

Furthermore, there are a growing number of studies that highlight the role of sex in opioid use and misuse. Studies show that women have a higher incidence of pain (Tsang et al., 2008) and report higher pain intensity compared with men (Arendt-Nielsen et al., 2004; Eriksen et al., 2003; Greenspan et al., 2007). Women are also more likely to be prescribed opioids and given higher doses for longer periods of time (Kelly et al., 2008; McCabe et al., 2005; Simoni-Wastila et al., 2004; Sullivan et al., 2005), whereas men demonstrate more substance abuse behavior than women (Kessler et al., 2005; Stinson et al., 2005). Women also report significantly higher cravings for opioids (Lee and Ho, 2013). Despite these findings, there is a lack of pre-clinical studies investigating sex as a biological variable in key brain nodes that are engaged during opioid exposure and withdrawal.

The bed nucleus of the stria terminalis (BNST), a component of the extended amygdala, is a ventral forebrain structure containing a large population of gamma-aminobutyric acid (GABA) neurons. The BNST functions as a critical relay center to regulate a range of emotional and motivational processes, receiving inputs from cortical and limbic structures, and via reciprocal projections with several limbic and hindbrain nuclei (Dong and Swanson, 2004, 2006; McElligott and Winder, 2009; Sun and Cassell, 1993). Recent studies have shown that GABAergic projection neurons from the BNST to the ventral tegmental area (VTA) and lateral hypothalamus (LH) drive reward-like behavior (Jennings et al., 2013a,b), and neuromodulation enhances fear and anxiety-like responses in the BNST by inhibiting these output neurons (Marcinkiewicz et al., 2016). The BNST plays a critical role in the negative valence associated with opioid withdrawal (Delfs et al., 2000) and inactivation of the BNST has been shown to block morphine withdrawal-potentiated startle (Harris et al., 2006). Moreover, the BNST is a highly sexually dimorphic brain region (Hisasue et al., 2010; Tsuneoka et al., 2017). These anatomically sexually dimorphic observations, however, were focused in the posterior division of the BNST where female mice contain roughly half the number of neurons as male mice (Shah et al., 2004; Xu et al., 2012), rather than the anterior portion of the BNST, which is thought to modulate drug seeking and motivational states. To date, there have not been detailed physiological studies investigating cellular responses to opioids in the anterior portion of the BNST in both male and female mice. Thus, the objective of this study is to examine sensitizing repeated bouts of withdrawal from an opioid analgesic, and to investigate the molecular modifications induced in the BNST of male and female mice.

## **Materials and Methods**

All experiments were performed in accordance with the University of North Carolina at Chapel Hill (UNC) Institutional Animal Care and Use Committee's guidelines. C57BL/6J male and female mice (aged 7 weeks; Jackson Laboratories) were group or singly housed within UNC animal facilities on a normal light cycle (lights on at 7 am, lights off at 7 pm) and given food and water *ad libitum*.

## **Morphine Withdrawal Paradigm**

To model morphine withdrawal we used 4 groups of animals: morphine-naloxone males (MNM), saline-naloxone males (SNM), morphine-naloxone females (MNF), and saline-naloxone females (SNF). To model withdrawal from opioid analgesics, we administered a naloxone-precipitated morphine withdrawal paradigm

(Fig. 1A). Mice were injected once daily at approximately 9am with morphine (10 mg/kg) or saline (0.1 mL/g) subcutaneously (s.c.), followed 2 h later by naloxone (1 mg/kg) s.c. These injections were repeated for 3 days. Following naloxone administration, mice were observed for 10 min and the following individual withdrawal symptoms were tallied and recorded: escape jumps, teeth chattering, wet dog shakes, paw tremors, diarrhea, excessive eye blinking, genital grooming, ptosis, and abnormal posturing. A daily composite global withdrawal score was determined for each mouse by adding the total number of escape jumps to all other withdrawal symptoms which were scored as either a 1 (present) or 0 (absent) (McNally and Akil, 2002).

### **Brain slice preparation whole-cell electrophysiology**

All electrophysiology experiments were performed approximately 24 h following the last naloxone administration. Mice were anesthetized (isoflurane) and decapitated as previously described (McElligott et al., 2010). Briefly, brains were quickly removed and placed in ice-cold (1-4° C) high-sucrose artificial cerebral spinal fluid (ACSF) (in mM: 194 sucrose, 20 NaCl, 4.4 KCl, 2 CaCl<sub>2</sub>, 1 MgCl<sub>2</sub>, 1.2 NaH<sub>2</sub>PO<sub>4</sub>, 10 glucose, 26 NaHCO<sub>3</sub>) that had been oxygenated (95% O<sub>2</sub>, 5% CO<sub>2</sub>) for a minimum of 15 minutes. Coronal slices (300 μm) containing the BNST were prepared using a Leica VT1000 (Leica, Germany), and slices were allowed to equilibrate in oxygenated ACSF (in mM: 124 NaCl, 4.4 KCl, 2 CaCl<sub>2</sub>, 1.2 MgSO<sub>4</sub>, 1 NaH<sub>2</sub>PO<sub>4</sub>, 10 glucose, 26 NaHCO<sub>3</sub>, 34° C) for at least 1 hour. Slices were then transferred to the submerged recording chamber and perfused with oxygenated ACSF (28-30 °C) at a rate of 2 ml/min.

### **Whole-Cell Recordings**

Slices were placed in a submerged chamber (Warner Instruments). BNST neurons were directly visualized with an upright video camera (Hamamatsu). Recording electrodes (3–6 MΩ) were pulled on a P-97 Flaming-Brown Micropipette Puller (Sutter Instruments) using thin-walled borosilicate glass capillaries. Spontaneous or miniature GABA<sub>A</sub>-mediated inhibitory postsynaptic currents (sIPSCs or mIPSCs) were acquired in voltage-clamp at -80mV holding potential in 5-minute blocks (Kash and Winder, 2006). Recording electrodes to examine IPSCs were filled with cesium chloride (CsCl) intracellular recording solution (in mM: 130 CsCl, 1 EGTA, 10 HEPES, 2 ATP, 0.2 GTP) in the presence of kynurenic acid (3mM), to block ionotropic glutamatergic receptor currents. mIPSCs were recorded in the presence of kynurenic acid and tetrodotoxin (TTX, 500nM) to block activity dependent synaptic release. Electrically evoked-IPSCs (eIPSCs) were

measured by local stimulation (0.1ms duration, two pulses) using a bipolar nichrome electrode while neurons were voltage-clamped at  $-70$  mV. Stimulation intensity was adjusted to obtain approximately 80% of the maximum response. Recordings examining neuronal excitability were performed in current-clamp using potassium gluconate (KGluc) intracellular recording solution (in mM: 135 KGluc, NaCl 5, MgCl<sub>2</sub> 2, HEPES 10, EGTA 0.6, Na<sub>2</sub>ATP 4, Na<sub>2</sub>GTP 0.4). Signals were acquired via a Multiclamp 700B amplifier (Molecular Devices), digitized and analyzed via pClamp 10.6 software (Molecular Devices). Input resistance, holding current, and access resistance were all monitored continuously throughout the duration of experiments. Experiments in which changes in access resistance were greater than 20% were not included in the data analysis.

The BNST contains both interneurons, and neurons the project to classical reward nuclei like the VTA and LH, which we term projection neurons (BNST<sub>proj</sub>). The projection neurons have characteristics of low capacitance, high input resistance, and lack I<sub>h</sub> potassium channel current (Kash and Winder, 2006; Dumont and Williams, 2004 Marcinkiewicz et al., 2016). In order to investigate the effects of our morphine withdrawal paradigm on this circuitry, we analyzed cells that displayed these distinct physiological characteristics defined by the absence of I<sub>h</sub> current, small membrane capacitance (average  $32.2 \pm 0.8$  pF), and high input resistance (average  $1060 \pm 38$  M $\Omega$ ).

## Drugs

Morphine sulfate (non-selective opioid receptor agonist) and naloxone HCl (non-selective opioid receptor antagonist) were purchased from Sigma Aldrich ([www.sigmaaldrich.com](http://www.sigmaaldrich.com)). Tetrodotoxin (TTX; sodium channel blocker) and kynurenic acid (non-selective glutamate receptor antagonist) were purchased from Abcam ([www.abcam.com](http://www.abcam.com)). Morphine sulfate and naloxone HCl were dissolved in sterile saline (0.9%) prior to injection. All drugs were injected at a volume of 0.1mL/10g.

## Data Analysis

Data are presented as mean  $\pm$  SEM or cumulative distributions  $\pm$  SEM. All statistical analyses were performed using GraphPad Prism version 7.03 for Windows ([www.graphpad.com](http://www.graphpad.com)). A Student's unpaired t-test

or 2-way ANOVA was performed where appropriate. If a significant interaction was detected in the 2-way ANOVA, a post-hoc Tukey HSD or Holm-Sidak test was performed.

## Results

### Morphine withdrawal in males and females

To model repeated opioid withdrawal, mice were subjected to a morphine withdrawal paradigm (Fig. 1A) modified from studies performed in rats (McElligott et al., 2013; Schulteis et al., 1999). Mice were injected (s.c.) with either 10 mg/kg morphine (in 0.9% saline) or equal volume saline and returned to their homecage. 2 hours later all mice were injected (s.c.) with 1 mg/kg naloxone (in 0.9% saline) and placed in a clear 58.4 cm X 41.3 cm X 31.4 cm plastic bin. Following administration of naloxone, we observed mice for 10 min and a withdrawal score was calculated (Fig. 1B & 1C). In males, the global withdrawal score had a significant drug by day interaction ( $F(2,120)=8.054$ ,  $p<0.001$ ). MNM mice ( $n=32$ ) demonstrated a sensitization of the global withdrawal score, with day 2 ( $p<0.0001$ ) and day 3 ( $p<0.0001$ ) significantly increased compared to day 1 (Fig. 1B). Similarly, data from MNF ( $n=25$ ) showed a drug by day interaction ( $F(2,96)=4.751$ ,  $p<0.05$ ) with day 3 significantly increased compared to day 1 ( $p<0.0001$ ), and day 3 significantly increased compared to day 2 ( $p<0.05$ ). While SNM ( $n=30$ ) and SNF ( $n=25$ ) mice exhibited a few signs of withdrawal following naloxone administration, there was no sensitization of this withdrawal over time.

Because recent evidence has demonstrated disparities in behavioral responding between male and female rodents (Becker and Chartoff, 2018; Shansky, 2018), we next compared the individual withdrawal behaviors between our MNM and MNF mice across the 3 days of treatment to note any potential sex differences. Both MNM and MNF mice exhibited escape jumps and periods of abnormal posture, where there was a main effect of day ( $p<0.001$  both measures; escape jumps:  $F(2, 110)=9.678$ , abnormal posture:  $F(2,110)=10.46$ ; Fig. 1D and E) but not of sex (jumps:  $p=0.722$ ; abnormal posture:  $p=0.998$ ). In contrast, MNF mice produced significantly more fecal boli (main effect of sex  $F(1,165)=18.36$ ,  $P<0.0001$ , Fig. 1E), and exhibited more paw tremors than MNM mice (main effect of sex  $F(1,162)=9.34$ ,  $P<0.01$ , Fig.1F). While both male and female animals exhibited symptoms of teeth chattering, genital grooming, swallowing movements, and wet dog shakes, we did not observe differences in day of withdrawal or sex across these measures. We

next evaluated changes in body weight following each bout of withdrawal and on the 4<sup>th</sup> day prior to euthanasia. MNM mice exhibited on average over 2.5% loss in body weight across the days of treatment (Fig. 1H). There was a significant drug by day interaction ( $F(3,357)=4.44$ ,  $p<0.01$ ) and post hoc analysis revealed that MNM mice significantly decreased body weight on day 2 ( $p<0.05$ ), day 3 ( $p<0.0001$ ), and day 4 ( $p<0.0001$ ) compared to baseline, and between MNM and SNM (day 2  $p<0.05$ , day 3  $p<0.05$ , day 4  $p<0.001$ ). Intriguingly, there was a day by drug interaction with female mice ( $F(2,297)=3.262$ ,  $p<0.05$ ), however, no changes in MNF mouse body weight were observed. Surprisingly, SNF mice demonstrated on average over a 1.5% increase in weight as compared to baseline (days 2-4 vs. baseline  $p<0.001$ ), and post-hoc analysis revealed significant differences between SNF and MNF mice on days 2 and 4 ( $p<0.01$ ,  $p<0.05$  respectively, Fig. 1I). These results suggest that male and female mice both experience significant withdrawal under our paradigm, but that the behaviors and physiological changes experienced during this withdrawal are qualitatively different between the sexes.

### **Morphine withdrawal increases BNST neuronal excitation in females, but not males**

To understand how opioid withdrawal may alter the flow of information through the BNST, we performed whole-cell electrophysiology on putative BNST projection neurons (BNST<sub>proj</sub>, see methods) 24 hours after the last precipitated withdrawal. Examining the resting membrane potential (RMP), we found a drug by sex interaction between groups ( $F(1,79)=4.049$ ,  $p<0.05$ ;  $-41.59 \pm 1.22$  mV for SNM,  $n=19$ ;  $-43.47 \pm 1.48$  mV for MNM,  $n=16$ ,  $-48.19 \pm 1.56$  mV for SNF,  $n=26$ ;  $-43.95 \pm 1.51$  mV for MNF,  $n=22$ , Fig. 2A). We next examined neuronal excitability in the BNST by measuring alterations in rheobase current. While we did not observe a drug by sex interaction here ( $p=0.22$ ), we observed a main effect of morphine exposure ( $p<0.01$ , Fig. 2B). Planned t-tests showed that in males, morphine withdrawal did not alter the rheobase current ( $12 \pm 1.58$  pA for SNM,  $n=18$ ;  $9.4 \pm 1.53$  pA for MNM,  $n=15$ ,  $p=0.25$ , Fig. 2B), however, it significantly decreased the rheobase current in female mice ( $15.15 \pm 2.2$  pA for SNF,  $n=23$ ;  $8.23 \pm 0.8$  pA for MNF,  $n=19$ ,  $p<0.01$ , Fig. 2B). In concert, these results suggest that morphine withdrawal increases BNST<sub>proj</sub> excitability in MNF, but not in MNM mice.

### **Morphine withdrawal alters BNST GABAergic signaling in males and females**



Due to the changes observed in excitability, and because within slice morphine withdrawal has been shown to enhance GABA transmission (Dumont and Williams, 2004), we hypothesized that there may be altered inhibitory tone driving these effects. Therefore, we investigated the ability of the *in vivo* withdrawal paradigm to induce a plastic change in synaptic inhibition on to BNST<sub>proj</sub>. In males, morphine withdrawal resulted in a significant leftward shift on the cumulative distribution curve for spontaneous-IPSC inter event interval (vs. SNM K-S test  $p < 0.0001$ , Fig 3A). In contrast, morphine withdrawal in females resulted in a rightward shift on the cumulative distribution curve for spontaneous-IPSC inter event interval (vs. SNM K-S test  $p < 0.0001$ , Fig. 3C). Furthermore, when we examined the within cell averages for frequency there was a significant drug by sex interaction ( $F(1,68)=10.26$ ,  $p < 0.01$ ;  $3.14 \pm 0.51$  Hz for SNM,  $n=14$ ;  $6.39 \pm 1.06$  Hz for MNM,  $n=22$ ,  $p < 0.05$ ;  $6.98 \pm 0.93$  Hz for SNF,  $n=17$ ;  $4.31 \pm 0.77$  Hz for MNF,  $n=19$ ,  $p < 0.05$ , Fig. 3E). In both males and females, we observed a trend for a decrease in sIPSC amplitude (cumulative distributions, K-S test,  $p=0.072$ ) following morphine withdrawal (Fig. 3B and 3D). Examining cell averages, there was a main effect of sex ( $p < 0.01$ ), but no interaction ( $55.75 \pm 8.14$  pA for SNM  $n=14$ ,  $47.42 \pm 5.45$  pA for MNM,  $n=22$ ;  $37.88 \pm 3.68$  pA for SNF,  $n=17$ ,  $35.76 \pm 3.50$  pA for MNF, Fig. 3F.) These data suggest that repeated morphine withdrawal engages a bidirectional plasticity in GABAergic tone on BNST<sub>proj</sub> in male and female mice, increasing GABA release in male mice and decreasing GABA release in female mice.

Previous research has shown that withdrawal can activate certain cell populations within the BNST (Dumont and Williams, 2004; Hamlin et al., 2004). To investigate the role of within slice excitability on morphine withdrawal induced plasticity of inhibitory transmission on BNST<sub>proj</sub>, we bath applied TTX (500 nM), to block action potentials and recorded mIPSCs 24 hours after the final naloxone injection. Similar to the sIPSC data, in males, we observed a leftward shift on the cumulative distribution curve for miniature-IPSC inter event interval (K-S test  $p < 0.0001$ , Fig 4A). In contrast to sIPSCs, the effect of withdrawal on mIPSCs in female mice resulted in a leftward shift of the cumulative distribution curve (K-S test  $p < 0.0001$ , Fig. 4C). Comparing within cell averages, we observed a strong trend for a main effect of sex ( $p=0.0825$ ) but not a significant interaction ( $1.26 \pm 0.22$  Hz for SNM,  $n=19$ ;  $1.84 \pm 0.25$  Hz for MNM,  $n=12$ ;  $2.02 \pm 0.58$  Hz for SNF,  $n=13$ ;  $2.76 \pm 0.68$  Hz for MNF,  $n=15$ ). Morphine withdrawal induced a rightward shift on the cumulative distribution curve for mIPSC amplitude in males, yet, similar to sIPSCs maintained a leftward shift in females (K-S test  $p < 0.0001$ , Fig. 4B

and 4D respectively). There was not a significant interaction, however, when within cell averages were examined ( $22.33 \pm 2.20$  pA for SNM,  $n=19$ ;  $24.79 \pm 2.47$  pA for MNM,  $n=12$ ;  $26.59 \pm 1.85$  pA for SNF,  $n=13$ ;  $26.54 \pm 3.58$  pA for MNF,  $n=15$ ). The cumulative distributions suggest that the observed increase in the frequency of GABA release was apparent for both sexes following the addition of TTX and revealed opposite mIPSC amplitude profiles. These data suggest that within slice activity may partially account for the divergent excitability and sIPSC profile observed between BNST<sub>proj</sub> in male and female mice following morphine withdrawal.

To test this hypothesis, we drove within slice excitability directly using a paired-pulse electrical stimulation (50 ms inter-stimulus interval) and recorded evoked IPSCs. Here, we found a significant main effect of drug treatment ( $p<0.01$ ). Furthermore, planned t-test showed morphine withdrawal significantly increased the paired-pulse ratio (PPR) in MNM compared to SNM ( $1.06 \pm 0.08$  PPR for SNM,  $n=12$ ;  $1.39 \pm 0.1$  PPR for MNM,  $n=20$ ,  $p<0.05$ , Fig. 5C), and MNF compared to SNF ( $1.08 \pm 0.07$  PPR for SNF,  $n=22$ ;  $1.42 \pm 0.12$  PPR for MNF,  $n=19$ ,  $p<0.05$ , Fig. 5C). These data suggest that promoting within slice activity reduces GABAergic synaptic efficacy in both sexes following withdrawal.

## Discussion

In this study, we aimed to model repeated cycles of opioid withdrawal as a major contributor to the development of OUD (Koob and Volkow, 2016). Recent data suggests that 4 of 5 new heroin users previously used a prescription opioid (Cicero et al., 2014). Therefore, it is likely that the transition to an OUD occurs in patients who experience withdrawal from clinically prescribed opioids, and thus they may misuse opioids and potentially seek illicit avenues to continue usage. Because of this, we administered a dose of morphine known to be analgesic in male mice, 10 mg/kg s.c. (Dykstra et al., 2011) followed by naloxone (1 mg/kg) across 3 days to investigate adaptations. Although the contribution of sex on the analgesic potency of opioids has been examined previously (Kest et al., 1999), few studies have investigated withdrawal characteristics in male and female rodents (Blum et al., 1976; Cicero et al., 2002). Both MNM and MNF experienced significant somatic signs of withdrawal and robust sensitization of withdrawal across the 3-day paradigm, however, on average females exhibited more somatic symptoms (Fig. 1B & 1C). This was surprising, given the aforementioned decreased sensitivity to the analgesic properties of morphine observed in females and the relatively low dose

of morphine administered. Additionally, weight loss has previously been described as a characteristic of morphine withdrawal (Goeldner et al., 2013; McElligott et al., 2013). Consistent with these studies, we found that MNM exhibited a 2.5% loss in body weight, however MNF did not lose weight across the paradigm (Fig. 1H and 1I). This decrease in body weight is likely not due to increased gut motility, because MNF produced significantly more fecal boli (Fig. 1E). This phenomenon in MNM may be attributed instead to a decrease in food consumption or an increase in energy expenditure. These data demonstrate that although there are differences in the analgesic properties of morphine between male and female mice, such analgesic differences do not necessarily correlate to experiences in withdrawal, suggesting that the physiological mechanisms in the brain underlying these behaviors may be sexually dimorphic.

A wealth of evidence suggests that the BNST acts as a central hub in the acute responses involved in opioid withdrawal, however, whether these changes lead to persistent alterations was unknown. Altering noradrenergic signaling within the BNST modulates both the somatic and affective components of morphine withdrawal (Delfs et al., 2000). Furthermore, the BNST is known to regulate feeding, fear, anxiety- and reward-like behaviors via projections to the VTA and LH (Jennings et al., 2013a,b; Marcinkiewicz et al., 2016). In male rodents, spontaneous and naloxone-precipitated withdrawal inhibits activity of VTA dopamine neurons (Diana et al., 1995; Georges et al., 2006) and hence, reduces dopamine release in the nucleus accumbens (Acquas et al., 1991; Kalivas, 1993). Additionally, studies implicate that orexin neurons in the LH contribute to somatic withdrawal behaviors (Georgescu et al., 2003; Sharf et al., 2008), and, inhibitory synaptic inputs from the BNST suppress the activity of LH glutamatergic neurons to regulate feeding (Jennings et al., 2013a). In the BNST, within slice morphine withdrawal increases GABAergic cell firing, enhancing the release of GABA. It was unknown however, if withdrawal could create plastic adaptations in inhibitory synapses that would persist 24 hours following the precipitation of withdrawal. Using a posthoc analysis, we focused our electrophysiology experiments on neurons putatively projecting to the VTA and LH exhibiting small capacitance, high input resistance, and lacking  $I_h$  current (see methods). In male mice, morphine withdrawal increased sIPSCs and mIPSCs frequency onto BNST<sub>proj</sub> suggesting an action potential independent enhancement in presynaptic GABA release onto this circuit. Similarly, female mice experiencing morphine withdrawal had an enhancement of inhibition on BNST<sub>proj</sub> when mIPSCs were examined; however, they exhibited decreased sIPSC and

enhanced neuronal excitability in the absence of TTX. These data suggest that within slice excitability in the BNST of the female mice following morphine withdrawal drives the opposing s/mIPSC results. To test this hypothesis, we actively promoted excitability in the slice by electrical stimulation. While electrical stimulation releases the GABA that we actively measure, it will also potentially release a host of other signaling factors within the slice (Karkhanis et al., 2016; Stella et al., 1997). Using a paired pulse protocol with a 50 ms inter-stimulus interval, we found that morphine withdrawal increased the PPR of evoked GABAergic transmission onto the BNST<sub>proj</sub> in both males and females. An increase in PPR is typically associated with a decrease in the release of neurotransmitter, similar to the observed decrease in sIPSC frequency in female mice. These data suggest that there are unknown factors within the slice that are released in an activity dependent fashion, which may regulate the GABAergic tone onto BNST<sub>proj</sub>. Furthermore, the data suggests that the release and/or abundance of these to-be-identified factors may be sexually dimorphic. Likely candidates for mediating this difference in GABAergic tone could be neuropeptides. Indeed, several neuropeptides investigated by our lab and others have shown differential effects on both pre- and postsynaptic GABAergic function (Kash and Winder, 2006; Krawczyk et al., 2011; Li et al., 2012; Normandeau et al., 2018; Pleil et al., 2015).

Finally, both male and female mice experiencing morphine withdrawal had a decrease in mIPSC amplitude on BNST<sub>proj</sub>, while also exhibiting an increase in mIPSC frequency. A decrease in mIPSC amplitude is typically consistent with a postsynaptic effect on GABA receptor function. The BNST contains a dense population of GABAergic interneurons (Kudo et al., 2012; Lebow and Chen, 2016) and receives GABAergic input largely through projections from the central nucleus of the amygdala (CeA) (Herman et al., 2013). Although we observe a host of changes in inhibition onto BNST<sub>proj</sub>, whether the observed alterations in GABAergic signaling stem from local BNST interneurons or through afferent input is unknown. Previous studies show that morphine withdrawal increases cFos expression, a marker of neuronal activation, in the BNST and CeA (Hamlin et al., 2004) and suggest that the CeA→BNST circuit contributes to the affective component of withdrawal (Nakagawa et al., 2005). Future studies will investigate the contributions of various GABAergic inputs onto BNST<sub>proj</sub>, and if the alterations we observe are occurring on disparate synapses.

Here we have presented evidence that both male and female mice exhibit significant withdrawal to a low dose of morphine, and that this withdrawal sensitizes over our 3-day paradigm. While female mice are less

sensitive to the analgesic properties of morphine in general, they appear to have enhanced sensitivity to withdrawal as evidenced by increased somatic withdrawal symptoms, but a decreased sensitivity to the weight loss associated with morphine withdrawal. Repeated morphine withdrawal differentially regulates GABAergic tone onto BNST<sub>proj</sub> in male and female mice, which may be due to within slice activity, and governs the excitability of BNST<sub>proj</sub>. Thus, our data highlight both behavioral and physiological sex differences to opioid withdrawal, and underscore the importance of conducting experiments in both sexes.

## References

- Acquas E, Carboni E, Di Chiara G (1991) Profound depression of mesolimbic dopamine release after morphine withdrawal in dependent rats. *Eur J Pharmacol* 193:133-134.
- Arendt-Nielsen L, Bajaj P, Drewes AM (2004) Visceral pain: Gender differences in response to experimental and clinical pain. *European Journal of Pain* 8:465-472.
- Becker JB and Chartoff E (2018) Sex differences in neural mechanisms mediating reward and addiction. *Neuropsychopharmacology* 0:1-18.
- Blum K, Eubanks JD, Wiggins B, Wallace JE (1976) Morphine withdrawal reactions in male and female mice. *Am J Drug Alcohol Abuse* 3:363-368.
- CDC, National Center for Health Statistics (2017) Wide-ranging online data for epidemiologic research (WONDER).
- Cicero TJ, Ellis MS, Surratt HL, Kurtz SP (2014) The changing face of heroin use in the United States a retrospective analysis of the past 50 years. *JAMA Psychiatry* 71:821-826.
- Cicero TJ, Nock B, Meyer ER (2002) Gender-linked differences in the expression of physical dependence in the rat. *Pharmacology Biochemistry and Behavior* 72:691-697.
- Delfs JM, Zhu Y, Druhan JP, Aston-Jones G (2000) Noradrenaline in the ventral forebrain is critical for opiate withdrawal-induced aversion. *Nature* 403:430-434.
- Diana M, Pistis M, Muntoni A, Gessa G (1995) Profound decrease of mesolimbic dopaminergic neuronal activity in morphine withdrawn rats. *The Journal of Pharmacology and Experimental Therapeutics* 272:781-785.
- Dong HW and Swanson LW (2004) Projections from Bed Nuclei of the Stria Terminalis, Posterior Division: Implications for Cerebral Hemisphere Regulation of Defensive and Reproductive Behaviors. *Journal of Comparative Neurology* 471:396-433.
- Dong HW and Swanson LW (2006) Projections from bed nuclei of the stria terminalis, anteromedial area: Cerebral hemisphere integration of neuroendocrine, autonomic, and behavioral aspects of energy balance. *Journal of Comparative Neurology* 494:142-178.
- Dumont EC and Williams JT (2004) Noradrenaline Triggers GABAA Inhibition of Bed Nucleus of the Stria Terminalis Neurons Projecting to the Ventral Tegmental Area. *Journal of Neuroscience* 24:8198-8204.
- Dykstra LA, Fischer BD, Balter RE, Henry FE, Schmidt KT, Miller LL (2011) Opioid antinociception, tolerance and dependence: Interactions with the N-methyl-D-aspartate system in mice. *Behavioural Pharmacology* 22:540-547.
- Edlund M, Martin B, Russo J, Devries A, Braden J, Sullivan M (2014) The Role of Opioid Prescription in Incident Opioid Abuse and Dependence Among Individuals with Chronic Non-Cancer Pain: The Role of Opioid Prescription. *Clin J Pain* 30:557-564.
- Eriksen J, Jensen MK, Sjøgren P, Ekholm O, Rasmussen NK (2003) Epidemiology of chronic non-malignant pain in Denmark. *Pain* 106:221-228.

- Fishman M (2008) Precipitated withdrawal during maintenance opioid blockade with extended release naltrexone. *Addiction* 103:1399-1401.
- Kanof PD, Aronson MJ, Ness R (1993) Organic mood syndrome associated with detoxification from methadone maintenance. *American Journal of Psychiatry* 150:423-428.
- Georges F, LeMoine C, Aston-Jones G (2006) No effect of morphine on ventral tegmental dopamine neurons during withdrawal. *Translational Research* 26:5720-5726.
- Georgescu D, Zachariou V, Barrot M, Mieda M, Willie JT, Eisch AJ, DiLeone RJ (2003) Involvement of the lateral hypothalamic peptide orexin in morphine dependence and withdrawal. *Journal of Neuroscience* 23:3106-11.
- Goeldner C, Lutz PE, Darcq E, Halter T, Clesse D, Ouagazzal AM, Kieffer BL (2011) Impaired emotional-like behavior and serotonergic function during protracted abstinence from chronic morphine. *Biological Psychiatry* 69:236-244.
- Greenspan JD, Craft RM, Leresche L, Arendt-Nielsen L, Berkley KJ, Fillingim RB, Traub RJ (2010) Studying sex and gender differences in pain and analgesia: A consensus report. *Pain* 132:26-45.
- Hamlin AS, Buller KM, Day TA, Osborne PB (2004) Effect of naloxone-precipitated morphine withdrawal on c-fos expression in rat corticotropin-releasing hormone neurons in the paraventricular hypothalamus and extended amygdala. *Neuroscience Letters* 362:39-43.
- Harris AC, Atkinson DM, Aase DM, Gewirtz JC (2006) Double dissociation in the neural substrates of acute opiate dependence as measured by withdrawal-potentiated startle. *Neuroscience* 139:1201-1210.
- Hedegaard H, Warner M, Minino AM (2017) Drug Overdose Deaths in the United States, 1999-2016. *NCHS Data Brief* 294:1-8.
- Herman MA, Contet C, Justice NJ, Vale W, Roberto M (2013) Novel Subunit-Specific Tonic GABA Currents and Differential Effects of Ethanol in the Central Amygdala of CRF Receptor-1 Reporter Mice. *Journal of Neuroscience* 33:3284-3298.
- Hisasue S, Seney ML, Immerman E, Forger NG (2010) Control of cell number in the bed nucleus of stria terminalis of mice: role of testosterone metabolites and estrogen receptors subtypes. *J Sex Med* 7:1401-1409.
- Jennings JH, Rizzi G, Stamatakis AM, Ung RL, Stuber GD (2013a) The inhibitory circuit architecture of the lateral hypothalamus orchestrates feeding. *Science* 341:1517-1521.
- Jennings JH, Sparta DR, Stamatakis AM, Ung RL, Pleil KE, Kash TL, Stuber GD (2013b) Distinct extended amygdala circuits for divergent motivational states. *Nature* 496:224-228.
- Kalivas PW (1993) Neurotransmitter regulation of dopamine neurons in the ventral tegmental area. *Brain Res Brain Res Rev* 18:75-113.
- Karkhanis AN, Rose JH, Weiner JL, Jones SR (2016) Early-life social isolation stress increases kappa opioid receptor responsiveness and downregulates the dopamine system. *Neuropsychopharmacology* 41:2263-2274.
- Kash TL and Winder DG (2006) Neuropeptide Y and corticotropin-releasing factor bi-directionally modulate inhibitory synaptic transmission in the bed nucleus of the stria terminalis. *Neuropharmacology* 51:1013-1022.



Krawczyk M, Georges FF, Sharma R, Mason X, Berthet A, Bézard E, Dumont EC (2011) Double-Dissociation of the Catecholaminergic Modulation of Synaptic Transmission in the Oval Bed Nucleus of the Stria Terminalis. *Journal of Neurophysiology* 105:145-153.

Kelly J, Cook SF, Kaufman DW, Anderson T, Rosenberg L, Mitchell AA (2008) Prevalence and characteristics of opioid use in the US adult population. *Pain* 138:507-513.

Kessler RC, Berglund P, Demler O, Jin R, Merikangas KR, Walters EE (2005) Lifetime Prevalence and Age-of-Onset Distributions of. *Arch Gen Psychiatry* 62:593-602.

Kest B, Wilson SG, Mogil JS (1999) Sex differences in supraspinal morphine analgesia are dependent on genotype. *The Journal of Pharmacology and Experimental Therapeutics* 289:1370-1375.

Koob GF and Volkow ND (2016) Neurobiology of addiction: a neurocircuitry analysis. *The Lancet Psychiatry* 3:760-773.

Kudo T, Uchigashima M, Miyazaki T, Konno K, Yamasaki M, Yanagawa Y, Watanabe M (2012) Three Types of Neurochemical Projection from the Bed Nucleus of the Stria Terminalis to the Ventral Tegmental Area in Adult Mice. *Journal of Neuroscience* 32:18035-18046.

Lebow MA and Chen A (2016) Overshadowed by the amygdala: The bed nucleus of the stria terminalis emerges as key to psychiatric disorders. *Molecular Psychiatry* 21:450-463.

Lee CWS and Ho IK (2013) Sex differences in opioid analgesia and addiction: Interactions among opioid receptors and estrogen receptors. *Molecular Pain* 9:45.

Li C, Pleil KE, Stamatakis AM, Busan S, Vong L, Lowell BB, Stuber GD, Kash TL (2012) Presynaptic inhibition of GABA release in the BNST by kappa opioid receptor signaling. *Biol Psychiatry* 71:725-732.

Marcinkiewicz CA, Mazzone CM, D'Agostino G, Halladay LR, Hardaway JA, DiBerto JF, Navarro M, Burnham N, Cristiano C, Tipton GJ, Ramakrishnan C, Kozicz T, Deisseroth K, Thiele TE, McElligott ZA, Holmes A, Heisler LK, Kash TL (2016) Serotonin engages an anxiety and fear-promoting circuit in the extended amygdala. *Nature* 537:97-101.

McCabe SE, Teter CJ, Boyd CJ (2005) Illicit use of prescription pain medication among college students. *Drug and Alcohol Dependence* 77:37-47.

McElligott Z and Winder D (2009) Modulation of Glutamatergic Synaptic Transmission in the Bed Nucleus of the Stria Terminalis. *Prog in NeuroPsychopharmacol Biol Psychiatry* 615:1-15.

McElligott ZA, Klug JR, Nobis WP, Patel S, Grueter BA, Kash TL, Winder DG (2010) Distinct forms of Gq-receptor-dependent plasticity of excitatory transmission in the BNST are differentially affected by stress. *Proceedings of the National Academy of Sciences* 107: 2271-2276.

McElligott ZA, Fox ME, Walsh PL, Urban DJ, Ferrel MS, Roth BL, Wightman MR (2013) Noradrenergic synaptic function in the bed nucleus of the stria terminalis varies in animal models of anxiety and addiction. *Neuropsychopharmacology* 38:1665-1673.

McHugh RK, Weiss RD, Cornelius M, Martel MO, Jamison RN, Edwards RR (2016) Distress intolerance and prescription opioid misuse among patients with chronic pain. *J Pain* 17:806-814.



- McNally GP and Akil H (2002) Role of corticotropin-releasing hormone in the amygdala and bed nucleus of the stria terminalis in the behavioral, pain modulatory, and endocrine consequences of opiate withdrawal. *Neuroscience*, 112:605-617.
- Nakagawa T, Yamamoto R, Fujio M, Suzuki Y, Minami M, Satoh M, Kaneko S (2005) Involvement of the bed nucleus of the stria terminalis activated by the central nucleus of the amygdala in the negative affective component of morphine withdrawal in rats. *Neuroscience* 134:9-19.
- Normandeau CP, Silva APV, Hawken ER, Angelis S, Sjaarda C, Liu X, Dumont ÉC (2017) A Key Role for Neurotensin in Chronic-Stress-Induced Anxiety-Like Behaviour in Rats. *Neuropsychopharmacology* 43:285-293.
- Pleil KE, Rinker JA, Lowery-Gionta EG, Mazzone CM, McCall NM, Kendra AM, Olson DP, Lowell BB, Grant KA, Thiele TE, Kash TL (2015) NPY signaling inhibits extended amygdala CRF neurons to suppress binge alcohol drinking. *Nat Neurosci* 18:545-552.
- Schulteis G, Heyser CJ, Koob GF (1999) Differential expression of response-disruptive and somatic indices of opiate withdrawal during the initiation and development of opiate dependence. *Behav Pharmacol* 10:235-242.
- Shah NM, Pisapia DJ, Maniatis S, Mendelsohn MM, Nemes A, Axel R (2004) Visualizing sexual dimorphism in the brain. *Neuron* 43:313-319.
- Shansky RM (2018) Sex differences in behavioral strategies: avoiding interpretational pitfalls. *Current Opinion in Neurobiology* 49:95-98.
- Sharf R, Sarhan M, Dileone RJ (2009) Orexin mediates morphine place preference, but not morphine-induced hyperactivity or sensitization. *Brain Res* 1317:24-32.
- Simoni-Wastila L, Ritter G, Strickler G (2004) Gender and other factors associated with the nonmedical use of abusable prescription drugs. *Subst Use Misuse* 39:1-23.
- Stella N, Schweitzer P, Plomelli D (1997) A second endogenous' cannabinoid that modulates long-term potentiation. *Nature* 388:773-778.
- Stinson FS, Grant BF, Dawson DA, Ruan WJ, Huang B, Saha T (2005) Comorbidity between DSM-IV alcohol and specific drug use disorders in the United States: Results from the National Epidemiologic Survey on Alcohol and Related Conditions. *Drug and Alcohol Dependence* 80:105-116.
- Sullivan MD, Edlund MJ, Steffick D, Unützer J (2005) Regular use of prescribed opioids: Association with common psychiatric disorders. *Pain* 119:95-103.
- Sun N and Cassell MD (1993) Intrinsic GABAergic neurons in the rat central extended amygdala. *The Journal of Comparative Neurology* 330:381-404.
- Tsang A, Von Korff M, Lee S, Alonso J, Karam E, Angermeyer MC, Watanabe M (2008) Common Chronic Pain Conditions in Developed and Developing Countries: Gender and Age Differences and Comorbidity With Depression-Anxiety Disorders. *Journal of Pain* 9:883-891.
- Tsuneoka Y, Tsukahara S, Yoshida S, Takase K, Oda S, Kuroda M, Funato H (2017) Moxd1 Is a Marker for Sexual Dimorphism in the Medial Preoptic Area, Bed Nucleus of the Stria Terminalis and Medial Amygdala. *Frontiers in Neuroanatomy* 11:1-13.

Xu X, Coats JK, Yang CF, Wang A, Ahmed OM, Alvarado M, Shah NM (2012) Modular genetic control of sexually dimorphic behaviors. *Cell* 148:596-607.

## **Funding and Disclosure**

This work was supported by NIH awards 4T32MH093315-05 and KO1AA02355502. The authors have no conflicts of interest.

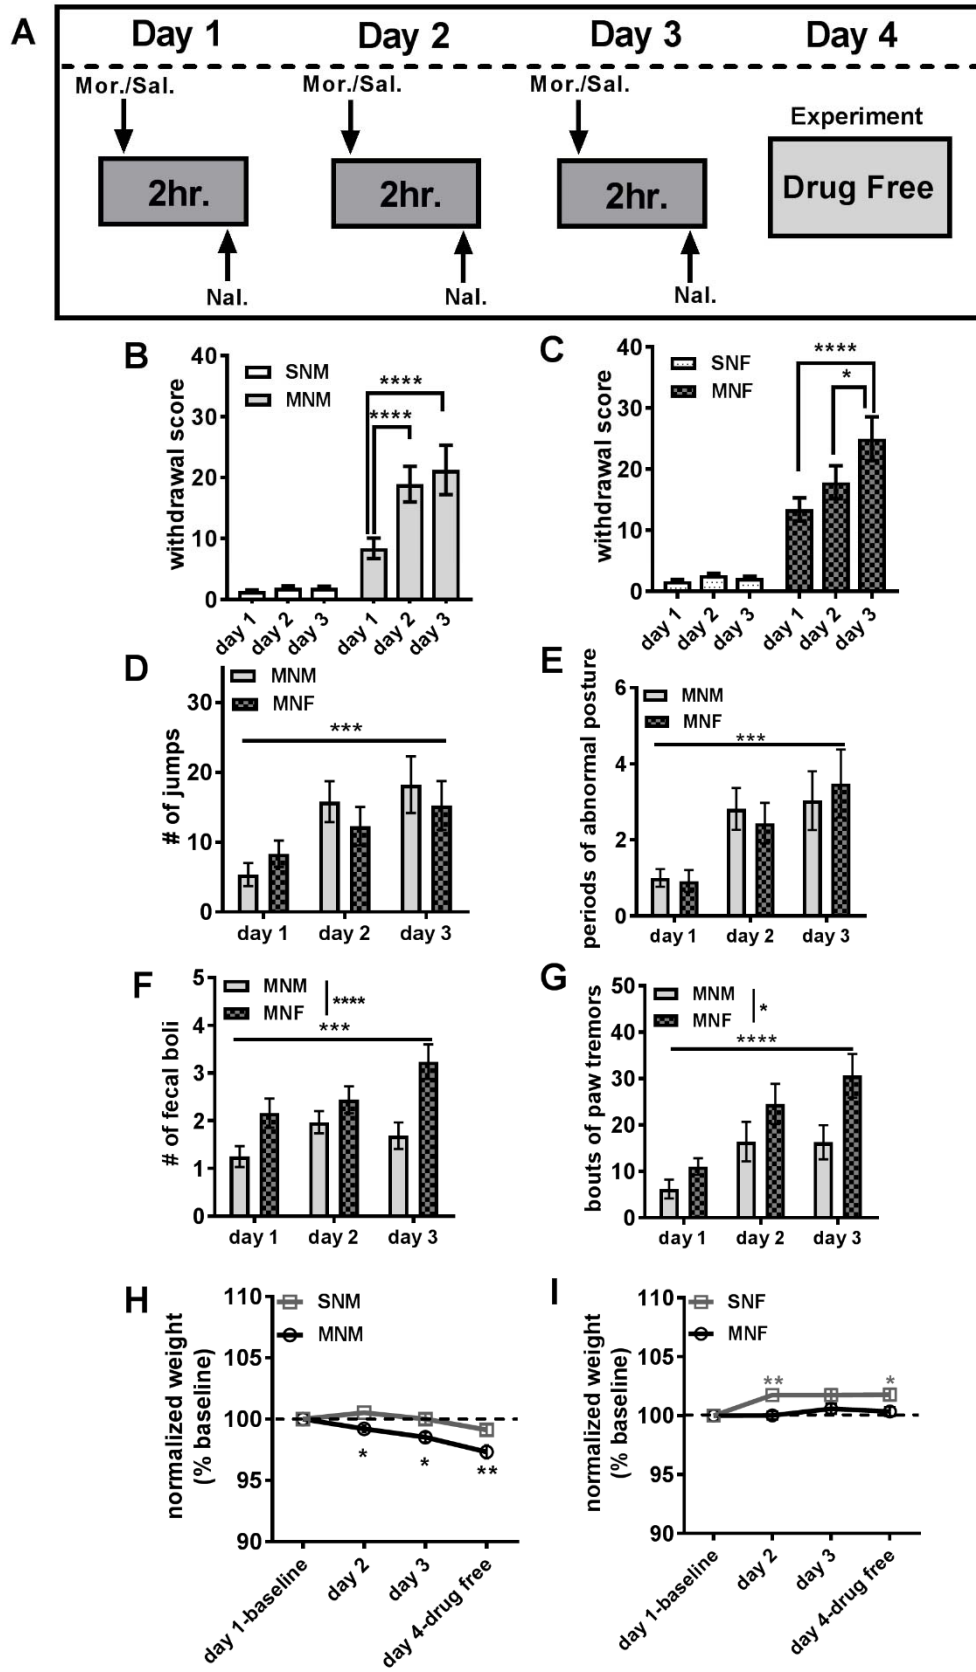

**Figure 1:** Morphine withdrawal in male and female mice **A)** Naloxone-precipitated morphine withdrawal paradigm. **B)** Average withdrawal scores in male mice (SNM n=22; MNM n=18). **C)** Average withdrawal scores in female mice (SNF n=15; MNF n=15). **D)** The average number of jumps between MNM and MNF. **E)** The average number of fecal boli produced between MNM and MNF. **F)** The average number of paw tremors between MNM and MNF. **G)** The average number of paw tremors between MNM and MNF. **H)** The average number of paw tremors between MNM and MNF. **I)** The average number of wet dog shakes between MNM and MNF. **H)** Average weight loss in male mice (% baseline). **I)** Average weight loss in female mice (% baseline). Each bar represents the mean  $\pm$  SEM, \* ( $p < 0.05$ ), \*\* ( $p < 0.01$ ), \*\*\* ( $p < 0.001$ ), \*\*\*\* ( $p < 0.0001$ ).

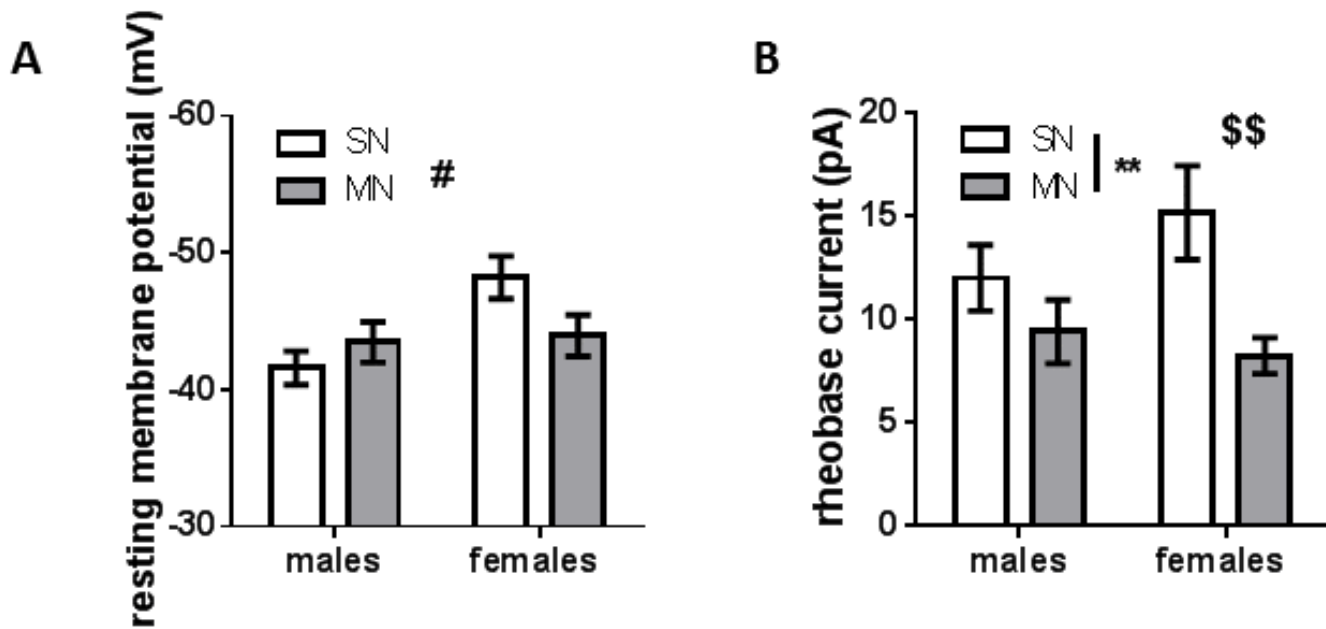

**Figure 2:** Morphine withdrawal alters properties of cell excitability in BNST<sub>proj</sub>. **A)** Bar graph of resting membrane potentials in BNST<sub>proj</sub> (# drug by sex interaction  $p < 0.05$ ) **B)** Bar graph of rheobase current (main effect of drug treatment \*\*  $P < 0.01$ ; \$\$ planned t-test  $P < 0.01$ , SNF  $n = 23$ ; MNF  $n = 21$ ). Each bar represents the mean  $\pm$  SEM.

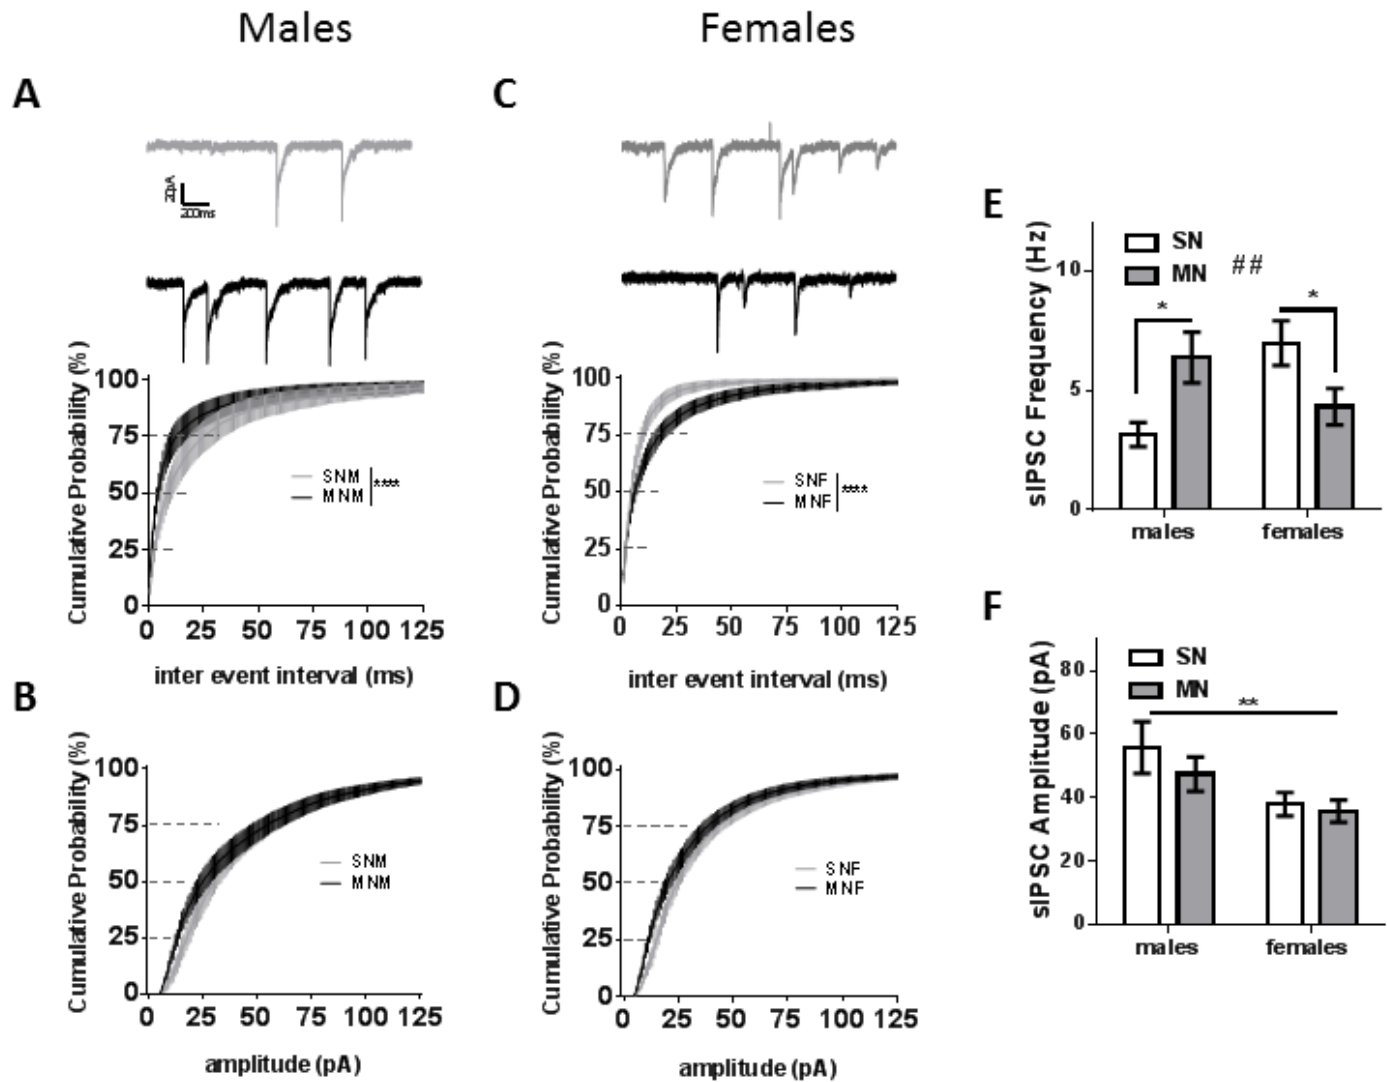

**Figure 3:** Morphine withdrawal differentially alters BNST spontaneous GABAergic transmission in male and female mice. **A)** Representative currents (SNM gray, MNM black) and cumulative distribution plot comparing sIPSC inter event interval in males (\*\*\*\*  $p < 0.0001$ , SNM  $n = 14$ ; MNM  $n = 22$ ). **B)** Cumulative distribution plot comparing sIPSC amplitude in males from the same cells as A. **C)** Representative currents (SNF gray, MNF black) and cumulative distribution plot comparing sIPSC inter event interval in females (\*\*\*\*  $p < 0.0001$ , SNF  $n = 17$ ; MNF  $n = 19$ ). **D)** Cumulative distribution plot comparing sIPSC amplitude in females from same cells as C. **E)** Bar graph of sIPSC frequency cell averages (## drug by sex interaction  $p < 0.01$ , \*  $P < 0.05$ ) **F)** Bar graph of sIPSC amplitude cell averages had main effect of sex (\*\*  $p < 0.01$ ).

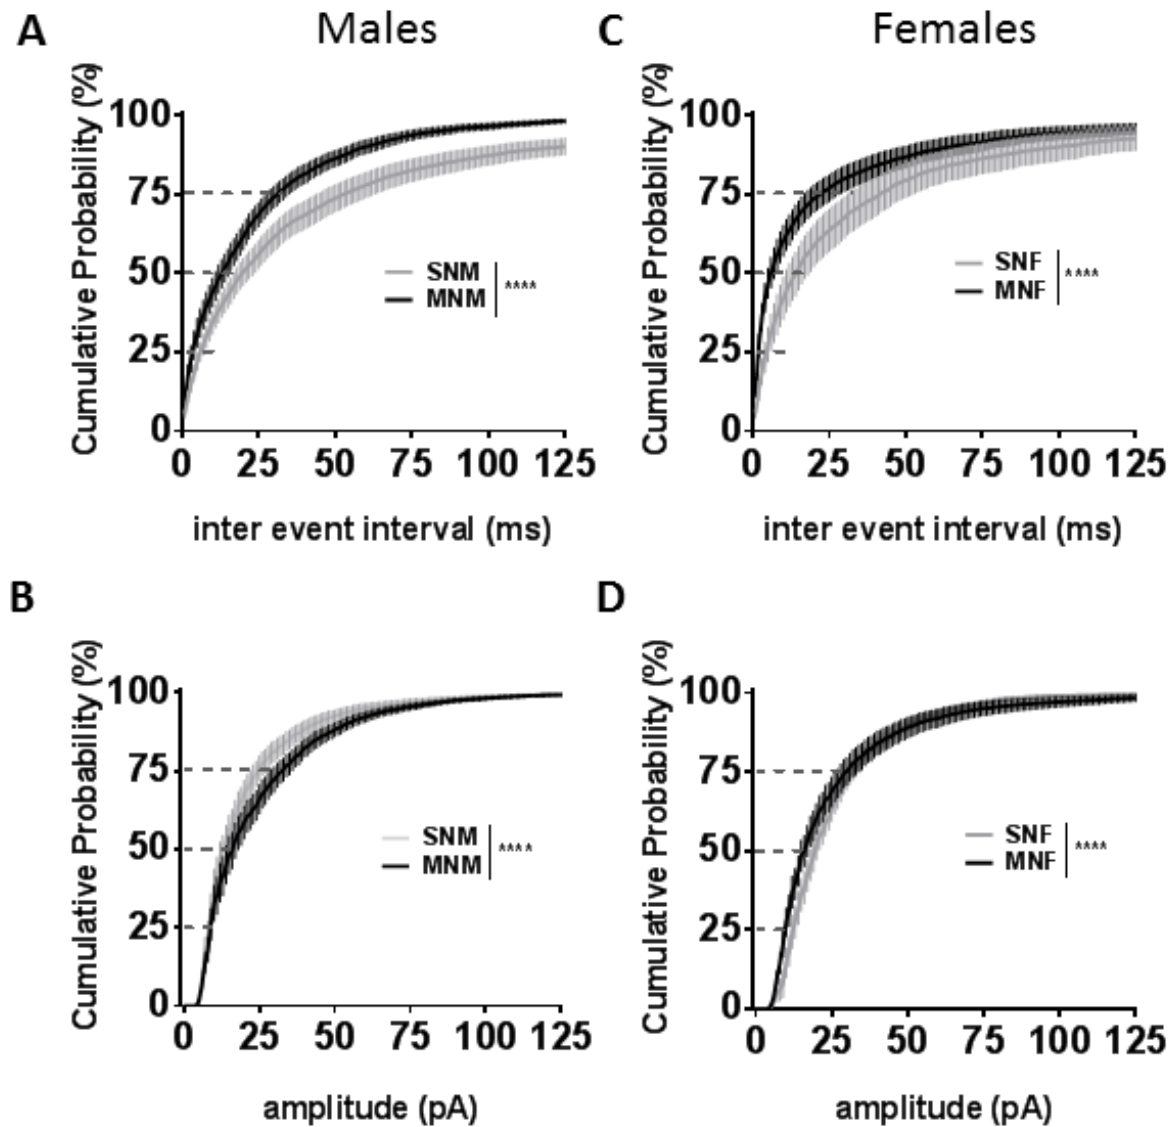

**Figure 4:** Alterations in BNST GABAergic signaling is unmasked by TTX in males and females. **A)** Cumulative distribution plot comparing miniature-IPSC inter event interval in male mice (SNM n=14; MNM n=22). **B)** Cumulative distribution plot comparing miniature-IPSC amplitude in male mice from the same cells as A. **C)** Cumulative distribution plot comparing miniature-IPSC inter event interval in female mice (SNF n=17; MNF n=19). **D)** Cumulative distribution plot comparing miniature-IPSC amplitude in female mice from the same cells as C. \*\*\*\* ( $p < 0.0001$ ).

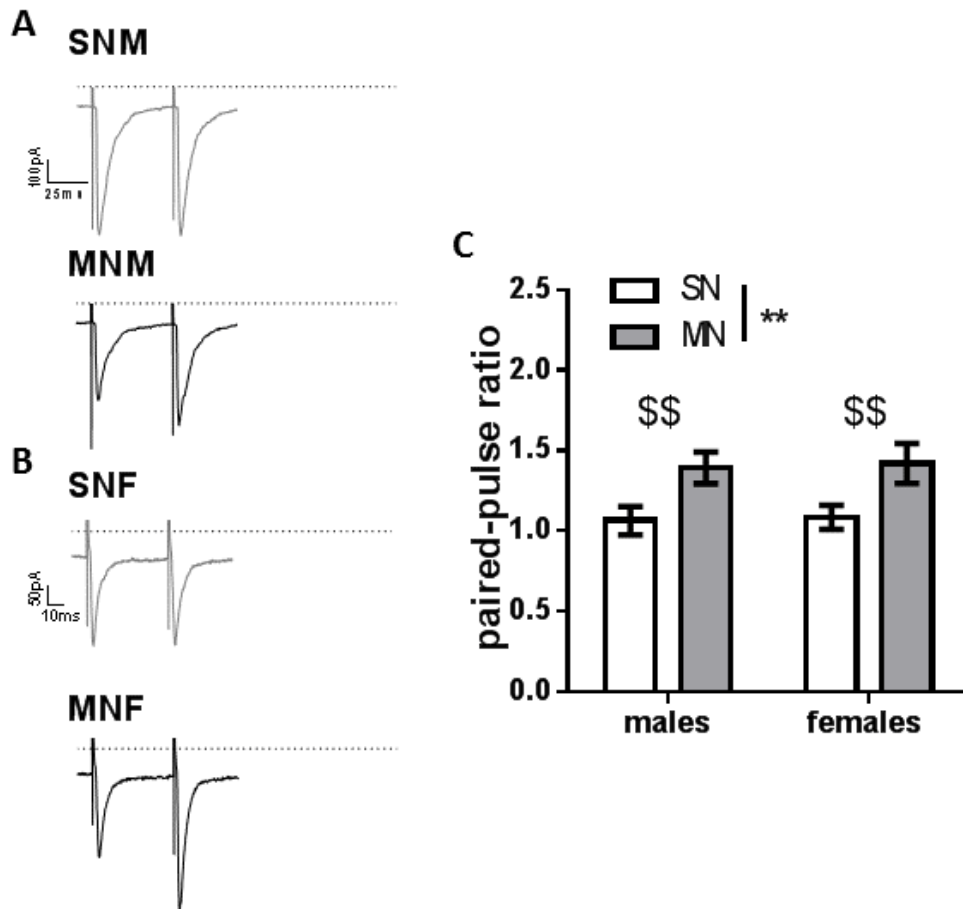

**Figure 5:** Morphine withdrawal increases the paired-pulse ratio in male and female mice. **A)** Representative paired-pulse traces from BNST neurons in male mice (SNM *top*; MNM *bottom*, dashed line 0 pA, scale bar 100 pA x 25 ms). **B)** Representative paired-pulse traces from BNST neurons in female mice (SNF, *top*; MNF *bottom*, scale bar 50 pA x 10 ms). **C).** Bar graph of paired-pulse ratios (main effect of drug treatment, \*\*  $p < 0.01$ ; \$\$ planned t-tests  $p < 0.01$ , SNM  $n = 12$ ; MNM  $n = 20$ , SNF  $n = 22$ ; MNF  $n = 19$ ). Each bar represents the mean  $\pm$  SEM.
